# Supplementary material for: Influence of medium range transport of particles from nucleation burst on particle number concentration within the urban airshed
Source: Copernicus journal article supplement (doi:10.5194/acp-12-4951-2012), 2012-06-07
Supplement: Supplementary file 1 [file acp-12-4951-2012-supplement.pdf]

## 1 Supplementary materials

| Date        | Daily maximum of relative PN contribution (%) | Daily minimum of relative PN contribution (%) | Enrichment factor |
|-------------|-----------------------------------------------|-----------------------------------------------|-------------------|
| 8 Feb 2009  | 12.1                                          | 0.3                                           | 40.3              |
| 15 Mar 2009 | 8.8                                           | 0.5                                           | 17.6              |
| 14 Apr 2009 | 8.5                                           | 0.4                                           | 21.3              |
| 3 Sep 2009  | 12.1                                          | 0.6                                           | 20.2              |
| 16 Sep 2009 | 7.5                                           | 0.7                                           | 10.7              |
| 17 Sep 2009 | 6.9                                           | 1.0                                           | 6.9               |
| 25 Oct 2009 | 13.9                                          | 1.2                                           | 11.6              |
| 28 Oct 2009 | 24.4                                          | 1.4                                           | 17.4              |
| 29 Oct 2009 | 9.0                                           | 1.8                                           | 5.0               |
| 2 Nov 2009  | 9.3                                           | 0.8                                           | 11.6              |
| 16 Nov 2009 | 11.7                                          | 1.6                                           | 7.3               |
| Average     |                                               |                                               | 15.4              |

2 **Table S1.** Enrichment factor of the relative PN contribution for the semi-urban area, Rocklea  
 3 under the influence of upwind pollution during the nucleation burst events. Only data  
 4 between the period of 08:00-16:00 have been used in the calculation.

5

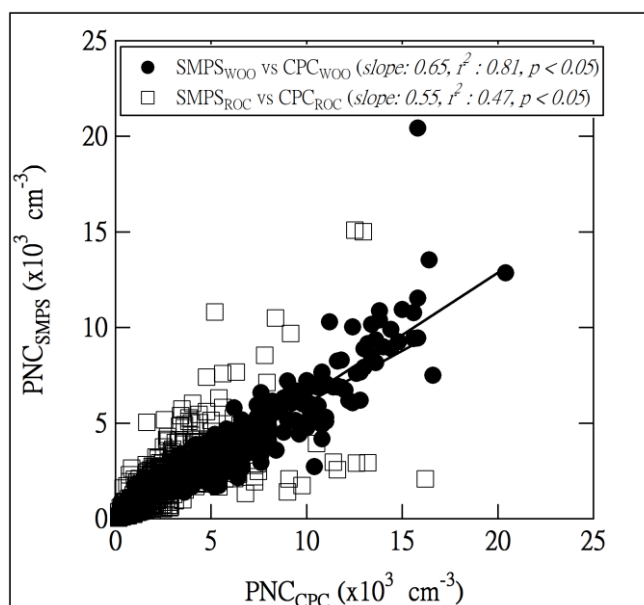

6

7 **Figure S1.** Scatter plots of PNCs measured by SMPS ( $PNC_{SMPs}$ ) and CPC ( $PNC_{CPC}$ ) at ROC  
 8 and WOO.

9

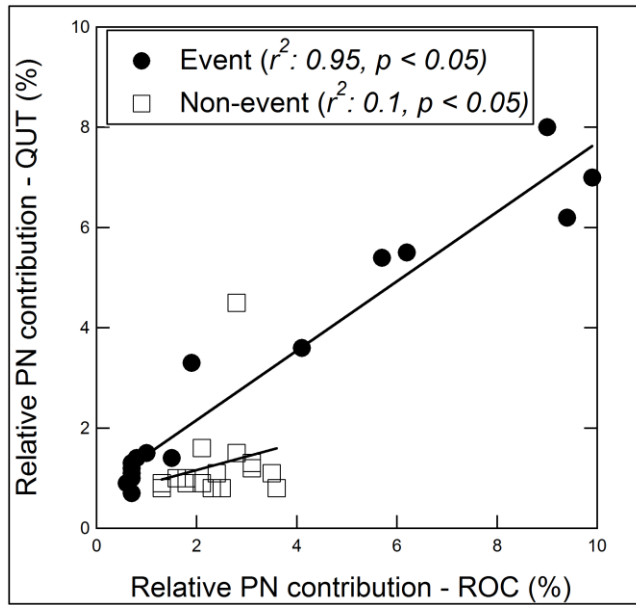

1

2

3

**Figure S2.** Scatter plots of relative PN contribution between QUT and ROC during nucleation event (9 Sep 2009) and non-event (8 Mar 2009).
